# Supplementary material
Source: publisher figshare collection journal article supplement (https://karger.figshare.com/ndownloader/files/30979156)
Supplement: Supplementary file 1 [file 30979156]

**Supplementary Material**

Table 1. Surface loss (μm) mean (standard-deviation) by treatment and day, in different age brackets.

| **Treatment** | **Substrate** | **Days** | **<20** | **20-29** | **30-39** | **40-49** | **50-59** | **60-69** | **≥70** |
| --- | --- | --- | --- | --- | --- | --- | --- | --- | --- |
| Sn+F | Dentin | 3 | 3.94 (1.18) | 4.50 (1.07) | 4.91 (1.03) | 5.15 (0.92) | 5.19 (0.86) | 5.17 (0.95) | 5.15 (1.27) |
| 5 | 4.79 (1.18) | 5.38 (1.21) | 5.88 (1.20) | 6.22 (1.08) | 6.36 (0.96) | 6.34 (0.92) | 6.41 (1.08) |
| 10 | 5.82 (1.45) | 6.56 (1.38) | 7.20 (1.39) | 7.67 (1.35) | 7.86 (1.28) | 7.84 (1.20) | 8.10 (1.24) |
| Enamel | 3 | 0.35 (0.36) | 0.44 (0.41) | 0.56 (0.48) | 0.71 (0.55) | 0.82 (0.62) | 0.79 (0.63) | 0.57 (0.51) |
| 5 | 0.19 (0.43) | 0.22 (0.45) | 0.27 (0.45) | 0.34 (0.49) | 0.41 (0.50) | 0.43 (0.48) | 0.31 (0.47) |
| 10 | 0.13 (0.38) | 0.15 (0.40) | 0.22 (0.43) | 0.35 (0.46) | 0.44 (0.47) | 0.44 (0.49) | 0.32 (0.51) |
| NaF | Dentin | 3 | 6.71 (0.90) | 7.21 (1.33) | 7.91 (1.51) | 8.54 (1.39) | 8.95 (1.25) | 9.07 (1.22) | 9.07 (1.36) |
| 5 | 8.08 (0.85) | 8.48 (1.32) | 9.38 (1.63) | 10.37 (1.65) | 11.20 (1.58) | 11.68 (1.46) | 12.07 (1.56) |
| 10 | 11.35 (1.47) | 11.73 (1.87) | 12.68 (2.49) | 13.94 (2.93) | 15.23 (3.13) | 16.16 (3.07) | 16.46 (3.00) |
| Enamel | 3 | 3.15 (1.24) | 3.51 (1.47) | 4.00 (1.40) | 4.23 (1.18) | 4.33 (1.15) | 4.41 (1.36) | 4.39 (1.51) |
| 5 | 6.38 (1.87) | 6.88 (2.26) | 7.63 (2.17) | 8.02 (1.83) | 8.18 (1.71) | 8.28 (1.92) | 8.44 (2.06) |
| 10 | 14.13 (2.86) | 15.04 (3.45) | 16.12 (3.46) | 16.59 (3.14) | 16.98 (3.04) | 17.56 (3.20) | 18.26 (3.50) |
| DIW | Dentin | 3 | 10.67 (1.19) | 10.87 (1.17) | 11.20 (1.17) | 11.40 (1.21) | 11.38 (1.30) | 11.39 (1.26) | 11.42 (1.21) |
| 5 | 15.48 (1.49) | 16.23 (1.95) | 17.38 (2.25) | 18.49 (2.23) | 18.95 (2.27) | 19.22 (2.22) | 19.58 (1.89) |
| 10 | 20.05 (2.53) | 21.75 (3.51) | 23.94 (4.10) | 25.98 (3.96) | 26.91 (3.73) | 27.39 (3.49) | 27.96 (2.67) |
| Enamel | 3 | 5.35 (1.49) | 5.46 (1.45) | 5.89 (1.39) | 6.23 (1.33) | 6.25 (1.47) | 6.40 (1.76) | 6.82 (1.93) |
| 5 | 9.10 (2.41) | 9.21 (2.20) | 9.76 (2.33) | 10.43 (2.50) | 10.80 (2.65) | 11.20 (2.76) | 11.78 (2.83) |
| 10 | 17.01 (3.49) | 18.16 (3.99) | 19.29 (4.13) | 20.29 (3.80) | 20.74 (3.54) | 20.87 (3.76) | 21.36 (3.96) |
